# Supplementary material for: Functional expression and pharmaceutical efficacy of cardiac-specific ion channels in human embryonic stem cell-derived cardiomyocytes
Source: PubMed Central journal article supplement (PMC5653792; doi:10.1038/s41598-017-14198-y), 2017-10-23
Supplement: 41598_2017_14198_MOESM2_ESM.pdf [file 41598_2017_14198_MOESM2_ESM.pdf]

# **Functional expression and pharmaceutical efficacy of cardiac-specific ion channels in human embryonic stem cell-derived cardiomyocytes**

Han Sol Kim<sup>1#</sup>, Jung Won Yoon<sup>2#</sup>, Hongliang Li<sup>1</sup>, Geun Ok Jeong<sup>2</sup>, Jin Ju Park<sup>2</sup>, Sung Eun Shin<sup>1</sup>, Il Ho Jang<sup>3</sup>, Jae Ho Kim<sup>2,4\*</sup>, Won Sun Park<sup>1\*</sup>

<sup>1</sup>Department of Physiology, Kangwon National University School of Medicine, Chuncheon, 24341, Republic of Korea; <sup>2</sup>Department of Physiology, School of Medicine, Pusan National University, Yangsan, 50612, Republic of Korea; <sup>3</sup>Department of Oral Biochemistry and Molecular Biology, Pusan National University School of Dentistry, Yangsan 50612, Republic of Korea; <sup>4</sup>Research Institute of Convergence Biomedical Science and Technology, Pusan National University Yangsan Hospital, Yangsan 50612, Republic of Korea

# These authors contributed equally to this work

## **\* Co-correspondence to:**

Jae Ho Kim, Ph.D., Department of Physiology, School of Medicine, Pusan National University, Yangsan 50612, Republic of Korea. Tel: +82-51-510-8073, Fax: +82-51-510-8076, E-mail: [jhkimst@pusan.ac.kr](mailto:jhkimst@pusan.ac.kr)

Won Sun Park, Ph.D., Department of Physiology, Kangwon National University School of Medicine, 1 Kangwondaehak-gil, Chuncheon, 24341, Republic of Korea.

Tel: +82-33-250-8834, Fax: +82-33-255-8809, E-mail: [parkws@kangwon.ac.kr](mailto:parkws@kangwon.ac.kr)

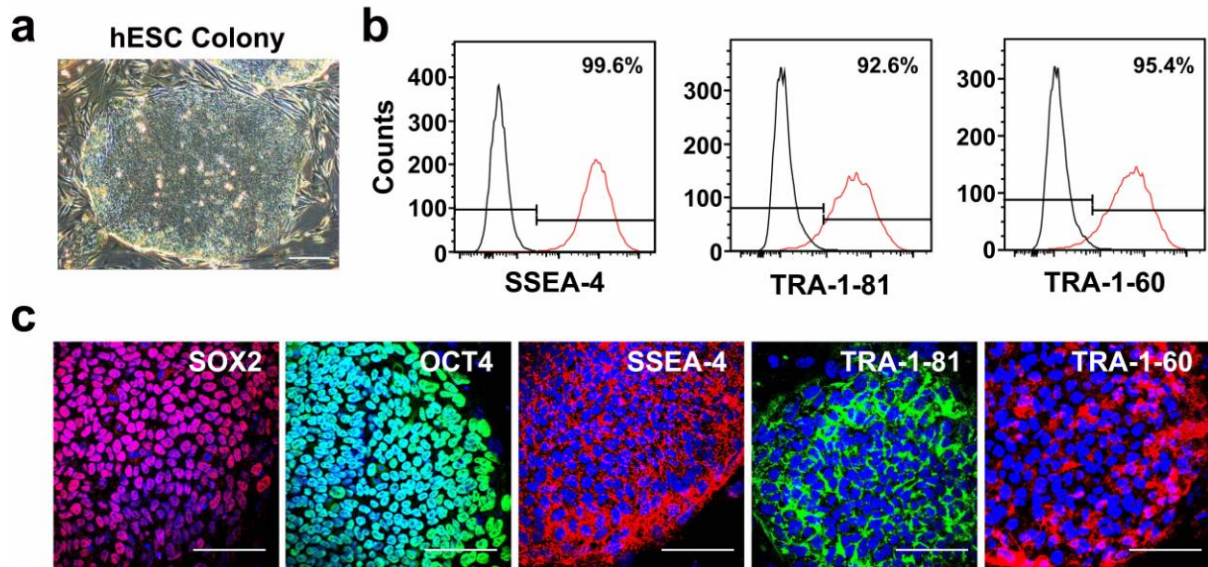

**Supplementary Figure S1. Characterization of pluripotency in hESCs.** (a) Phase bright image of hESC colony morphology at day5. (b) Flowcytometry analysis of expression of SSEA-4, TRA-1-60, and TRA-1-81 was performed on hESCs. (c) Immunfluorescent staining for expression of SOX2(red), OCT4(green), SSEA-4(red), TRA-1-81(green), and TRA-1-60(red) was performed on undifferentiated hESCs. Nuclie were stained with DAPI and merge images are shown. Abbreviation; hESCs(human embryonic stem cells) (a) Scale bar=200 $\mu$ m. (c) Scale bar=100 $\mu$ m.

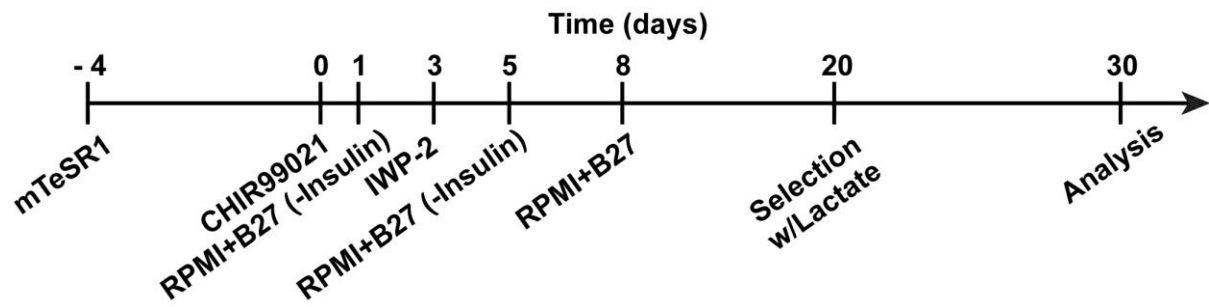

**Supplementary Figure S2. Schematic presentation of differentiation protocol for H9 hESCs to cardiomyocytes.** H9 cells were dissociated to single cell and cultured on Matrigel-coated plate at day -4.

**Supplementary Table S1. The primer sequences for RT-PCR**

| Primer              | Sequence                                                           |
|---------------------|--------------------------------------------------------------------|
| GATA4               | F : CAG GCG TTG CAC AGA TAG TG<br>R : CCC GAC ACC CCA ATC TC       |
| GATA6               | F : TGT AGA GCC CAT CTT GAC CC<br>R : TCC CCC ACA ACA CAA CCT AC   |
| cTnT                | F : AAG ATC AGC TGA GGG AGA AG<br>R : GGT CTT GGA GAC TTT CTG GT   |
| OCT4                | F : ACG ACC ATC TGC CGC TTT GAG<br>R : GCC TCT CAC TCG GTT CTG AT  |
| NANOG               | F : CAA AGG CAA ACA ACC CAC TT<br>R : TCT GCT GGA GGC TGA GGT AT   |
| Ca <sub>v</sub> 1.1 | F : AAC GCC AAG AGG AGT ATT ATG<br>R : ATGGCTGTTGCTATGGTTGC        |
| Ca <sub>v</sub> 1.2 | F : CTG CAG GTG ATG ATG AGG TC<br>R : GCGGTGTTGTTGGCGTTGTT         |
| Ca <sub>v</sub> 3.1 | F : GAA GTG CTA CAG GGT GGA GGC<br>R : CCA GGT CTG CTG GGT CAG AGG |
| GAPDH               | F : GGA GCC AAA AGG GTC ATC AT<br>R : GTG ATG GCA TGG ACT GTG GT   |

**Supplementary Table S2. The primer sequences for Quantitative RT-PCR(q-PCR)**

| Primer              | Sequence                                                               |
|---------------------|------------------------------------------------------------------------|
| $\alpha$ -MHC       | F : TGT GGT GCC TCG TTC CA<br>R : TTT CGG AGG TAC TGG GCT G            |
| $\beta$ -MHC        | F : GCA TTC TCC TGC TGT TTC CTT<br>R : TGG ATT CTC AAA CGT GTC TAG TGA |
| Na <sub>v</sub> 1.5 | F : TGT ATG TCC TCA GTC CCT TC<br>R : CTT GAC CAG AGA CTC AAA GG       |
| K <sub>v</sub> 11.1 | F : AGT GAC CGT GAG ATC ATA GC<br>R : GAG TAG GGT GTG AAG ACA GC       |
| GAPDH               | F : GGA GCC AAA AGG GTC ATC AT<br>R : GTG ATG GCA TGG ACT GTG GT       |
